# Supplementary material
Source: HighWire-hosted journal article supplement (https://www.haematologica.org/content/suppl/2015/06/02/haematol.2014.118463)
Supplement: Triviai_2014-118463_GA_v3-01.pdf [file Triviai_2014-118463_GA_v3-01.pdf]

## CD133 marks a stem cell population that drives human Primary Myelofibrosis

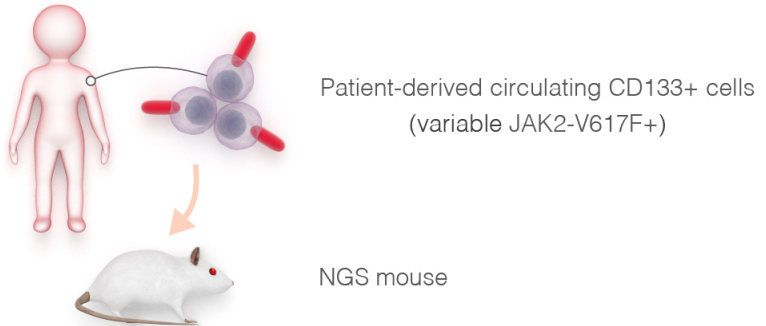

### Primary Myelofibrosis - Chronic phase

- myeloid (JAK2-V617F+) but no lymphoid cells
- atypical megakaryocytes (JAK2-V617F+)
- initiation of prefibrotic state, splenomegaly
- splenic fibrosis
- >10 months engraftment

### Primary Myelofibrosis - Acute phase

- acute myeloid leukemia transformation (CD34+/CD33+)
- 1 from 2 mice (1 patient)
- EZH2-D265H+
- JAK2-V617F-
